# Supplementary material for: Evaluating the Potential Anticancer Properties of Salvia triloba in Human-Osteosarcoma U2OS Cell Line and Ovarian Adenocarcinoma SKOV3 Cell Line
Source: MDPI journal article supplement (doi:10.3390/app122211545), 2022-11-15
Supplement: s1 [file s1]

# CompuSyn Report

**Experiment Name:** S. triloba-PTX combo  
**Date:** 17-Aug-2022  
**File Name:** E:\AUC-BIOT\Miscellaneous\Naela Saleh\Naela- Sage Progect\Files from Naela\Combination troubleshoot\_Eric-F.cse

## Description

**Drug:** Salvia triloba (ST) [ $\mu\text{g/ml}$ ]  
**Drug:** Paclitaxel (PTX) [ $\mu\text{g/ml}$ ]  
**Drug Combo:** S.triloba-Paclitaxel (ST-PTX) (ST+PTX [1:0.04142])

---

Data for Drug: ST [ $\mu\text{g/ml}$ ]

| Dose | Effect |
|------|--------|
|------|--------|

|      |      |
|------|------|
| 0.25 | 0.01 |
|------|------|

|      |         |
|------|---------|
| 19.0 | 0.41077 |
|------|---------|

|      |         |
|------|---------|
| 38.0 | 0.51115 |
|------|---------|

|      |        |
|------|--------|
| 76.0 | 0.3187 |
|------|--------|

|       |         |
|-------|---------|
| 152.0 | 0.65196 |
|-------|---------|

|       |     |
|-------|-----|
| 304.0 | 0.9 |
|-------|-----|

6 data points entered.

**X-int:** 1.70696

**Y-int:** -1.4655 +/- 0.22637

**m:** 0.85854 +/- 0.12736

**Dm:** 50.9282

**r:** 0.95870

---

Data for Drug: PTX [ $\mu\text{g/ml}$ ]

| Dose | Effect |
|------|--------|
|------|--------|

|      |      |
|------|------|
| 0.01 | 0.01 |
|------|------|

|       |         |
|-------|---------|
| 0.787 | 0.97536 |
|-------|---------|

|       |         |
|-------|---------|
| 1.574 | 0.97752 |
|-------|---------|

|       |     |
|-------|-----|
| 3.148 | 0.9 |
|-------|-----|

|       |         |
|-------|---------|
| 6.296 | 0.95046 |
|-------|---------|

|        |         |
|--------|---------|
| 12.592 | 0.97428 |
|--------|---------|

6 data points entered.

**X-int:** -0.6564

**Y-int:** 0.74937 +/- 0.29300

**m:** 1.14170 +/- 0.28949

**Dm:** 0.22062

**r:** 0.89187

---

Data for Drug Combo: ST-PTX (ST+PTX [1:0.04142])

| Dose A | Effect |
|--------|--------|
|--------|--------|

| Dose A   | Effect  |
|----------|---------|
| 0.24360+ | 0.01    |
| 19.0000+ | 0.88325 |
| 38.0000+ | 0.85706 |
| 76.0001+ | 0.83451 |
| 152.000+ | 0.81048 |
| 304.000+ | 0.9     |

6 data points entered.

**X-int:** 1.14100

**Y-int:** -1.0845 +/- 0.36808

**m:** 0.95052 +/- 0.20533

**Dm:** 13.8357

**r:** 0.91799

### Dose-Effect Curve

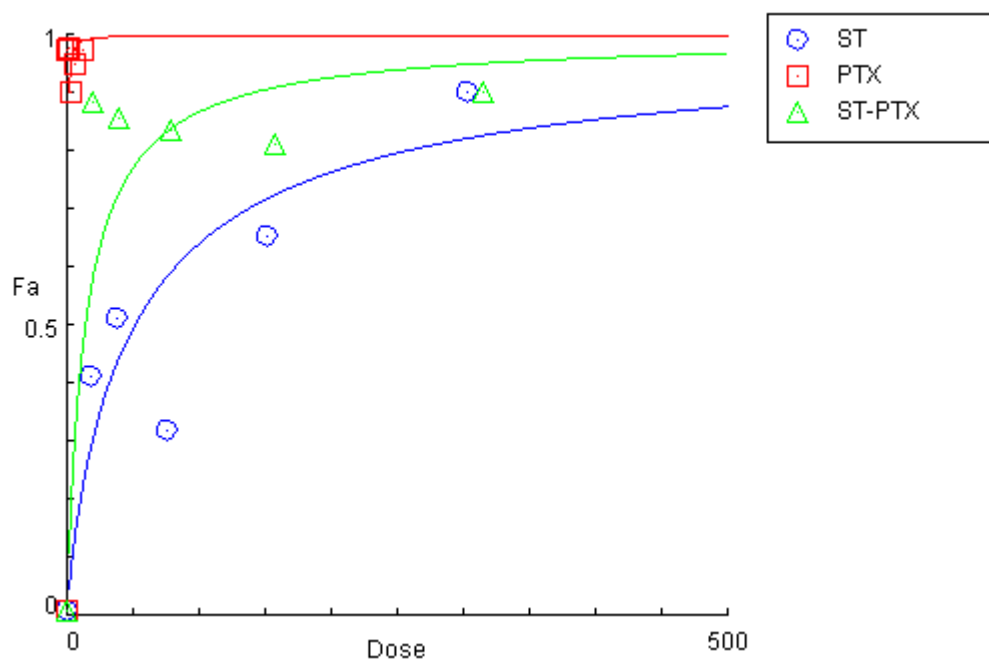

## Median-Effect Plot

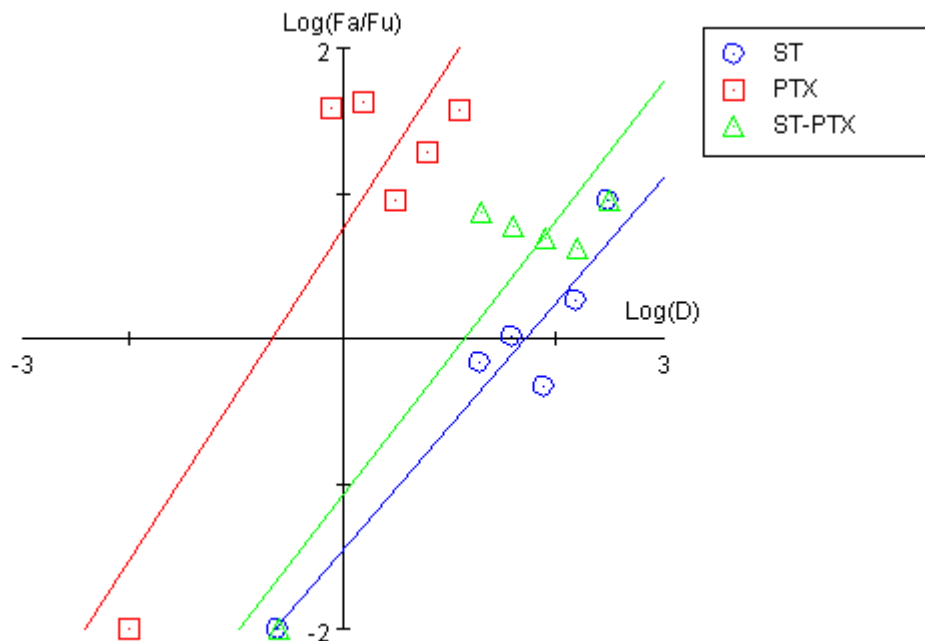

CI Data for Drug Combo: ST-PTX (ST+PTX [1:0.04142])

| Fa   | CI Value | Total Dose |
|------|----------|------------|
| 0.05 | 1.84836  | 0.62472    |
| 0.1  | 2.02789  | 1.37116    |
| 0.15 | 2.15473  | 2.23081    |
| 0.2  | 2.25880  | 3.21813    |
| 0.25 | 2.35064  | 4.35558    |
| 0.3  | 2.43544  | 5.67377    |
| 0.35 | 2.51630  | 7.21378    |
| 0.4  | 2.59540  | 9.03119    |
| 0.45 | 2.67448  | 11.2025    |
| 0.5  | 2.75515  | 13.8357    |
| 0.55 | 2.83907  | 17.0879    |
| 0.6  | 2.92818  | 21.1963    |
| 0.65 | 3.02497  | 26.5364    |
| 0.7  | 3.13293  | 33.7391    |
| 0.75 | 3.25740  | 43.9500    |
| 0.8  | 3.40740  | 59.4841    |
| 0.85 | 3.60032  | 85.8108    |
| 0.9  | 3.87692  | 139.609    |
| 0.95 | 4.37727  | 306.420    |
| 0.97 | 4.77780  | 536.084    |

CI values for actual experimental points:

| Total Dose | Fa      | CI Value |
|------------|---------|----------|
| 0.25369    | 0.01    | 3.56939  |
| 19.787     | 0.88325 | 0.64147  |

| Total Dose | Fa      | CI Value |
|------------|---------|----------|
| 39.574     | 0.85706 | 1.57872  |
| 79.148     | 0.83451 | 3.68557  |
| 158.296    | 0.81048 | 8.54131  |
| 316.592    | 0.9     | 8.79168  |

## Combination Index Plot

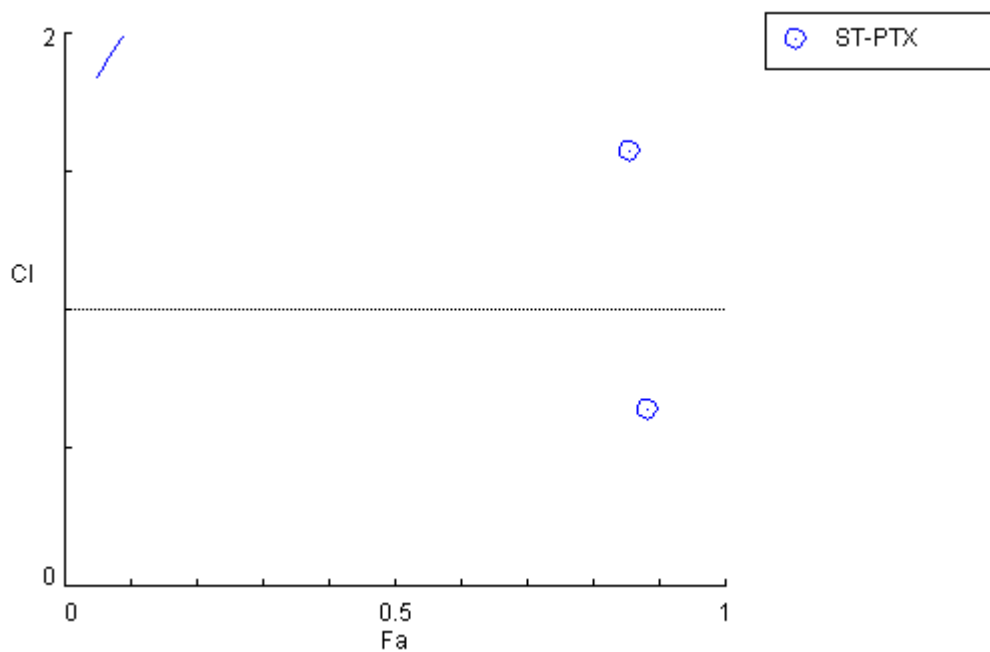

## Logarithmic Combination Index Plot

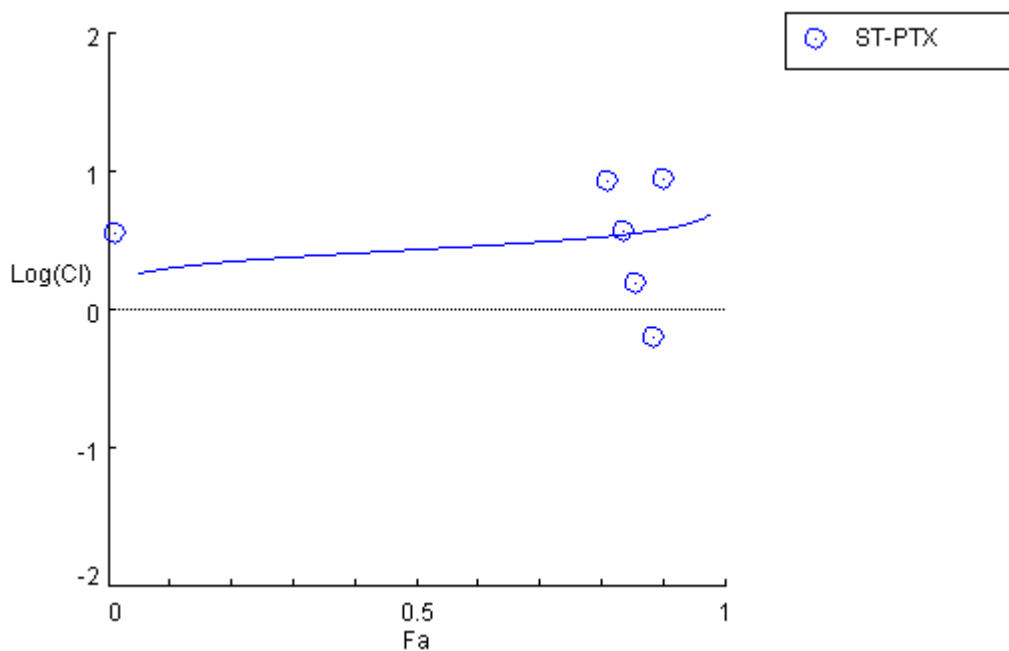

DRI Data for Drug Combo: ST-PTX (ST+PTX [1:0.04142])

| Fa | Dose ST | Dose PTX | DRI ST | DRI PTX |
|----|---------|----------|--------|---------|
|----|---------|----------|--------|---------|

| <b>Fa</b> | <b>Dose ST</b> | <b>Dose PTX</b> | <b>DRI ST</b> | <b>DRI PTX</b> |
|-----------|----------------|-----------------|---------------|----------------|
| 0.05      | 1.65006        | 0.01673         | 2.75067       | 0.67349        |
| 0.1       | 3.93987        | 0.03220         | 2.99239       | 0.59042        |
| 0.15      | 6.75308        | 0.04829         | 3.15257       | 0.54421        |
| 0.2       | 10.1320        | 0.06551         | 3.27881       | 0.51182        |
| 0.25      | 14.1651        | 0.08428         | 3.38688       | 0.48653        |
| 0.3       | 18.9823        | 0.10504         | 3.48420       | 0.46546        |
| 0.35      | 24.7636        | 0.12828         | 3.57501       | 0.44711        |
| 0.4       | 31.7579        | 0.15467         | 3.66212       | 0.43060        |
| 0.45      | 40.3133        | 0.18506         | 3.74764       | 0.41534        |
| 0.5       | 50.9282        | 0.22062         | 3.83338       | 0.40092        |
| 0.55      | 64.3382        | 0.26301         | 3.92108       | 0.38699        |
| 0.6       | 81.6705        | 0.31468         | 4.01265       | 0.37328        |
| 0.65      | 104.738        | 0.37942         | 4.11043       | 0.35949        |
| 0.7       | 136.637        | 0.46339         | 4.21756       | 0.34532        |
| 0.75      | 183.104        | 0.57749         | 4.33875       | 0.33037        |
| 0.8       | 255.990        | 0.74297         | 4.48175       | 0.31404        |
| 0.85      | 384.074        | 1.00801         | 4.66121       | 0.29535        |
| 0.9       | 658.318        | 1.51163         | 4.91074       | 0.27224        |
| 0.95      | 1571.87        | 2.90856         | 5.34227       | 0.23866        |
| 0.97      | 2919.85        | 4.63358         | 5.67223       | 0.21732        |

DRI values calculated at experimental points

| <b>Fa</b> | <b>Dose ST</b> | <b>Dose PTX</b> | <b>DRI ST</b> | <b>DRI PTX</b> |
|-----------|----------------|-----------------|---------------|----------------|
| 0.01      | 0.24126        | 0.00394         | 0.99041       | 0.39067        |
| 0.88325   | 537.766        | 1.29834         | 28.3034       | 1.64978        |
| 0.85706   | 410.192        | 1.05914         | 10.7945       | 0.67291        |
| 0.83451   | 335.273        | 0.91010         | 4.41148       | 0.28911        |
| 0.81048   | 276.715        | 0.78777         | 1.82049       | 0.12513        |
| 0.9       | 658.318        | 1.51163         | 2.16552       | 0.12005        |

## DRI Plot for Combo: ST-PTX (ST+PTX [1:0.04142])

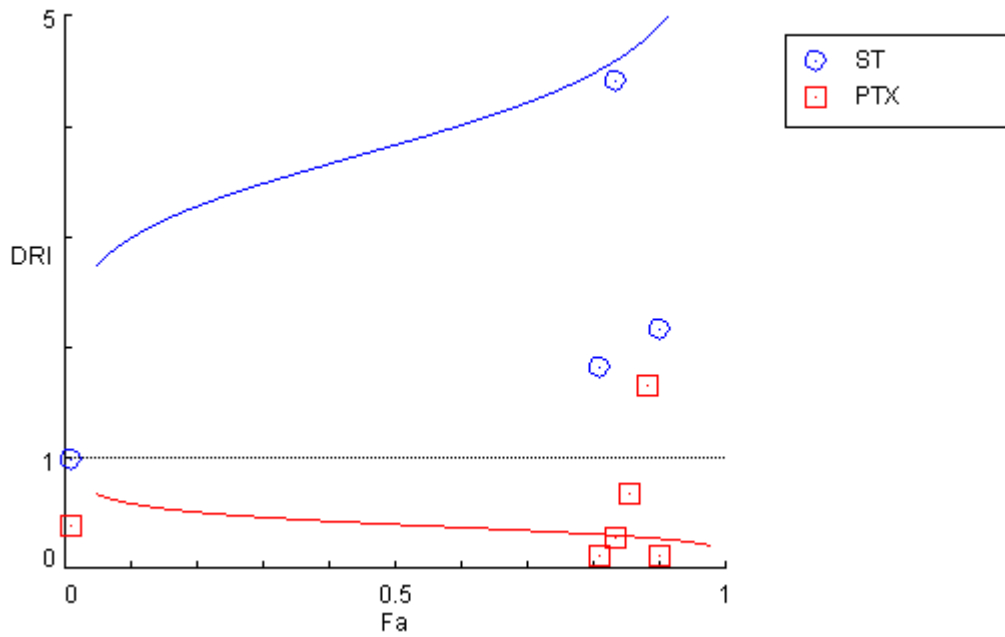

## Log(DRI) Plot for Combo: ST-PTX (ST+PTX [1:0.04142])

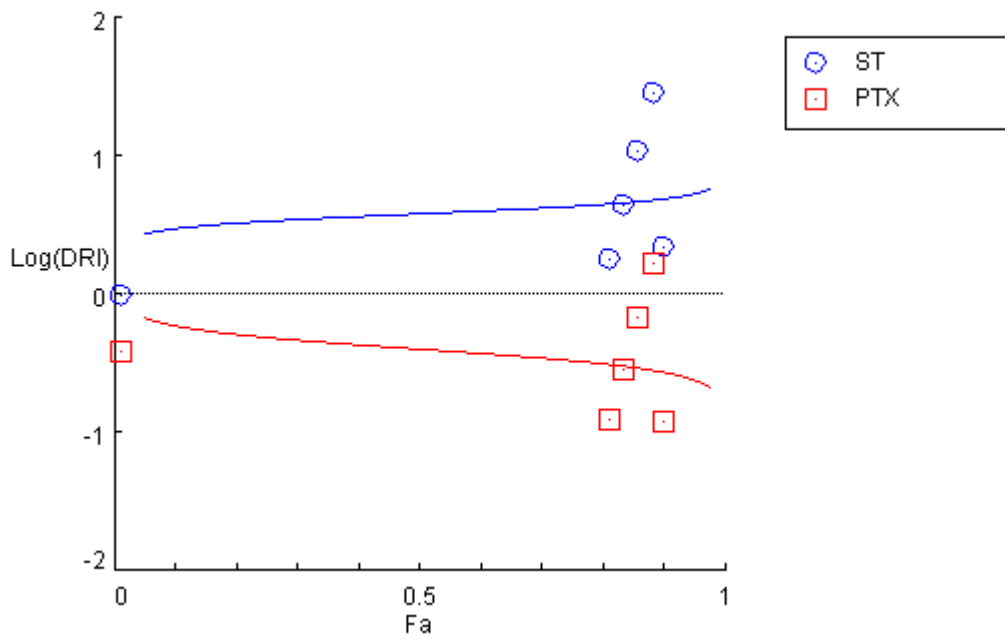

## Isobologram for Combo: ST-PTX (ST+PTX [1:0.04142])

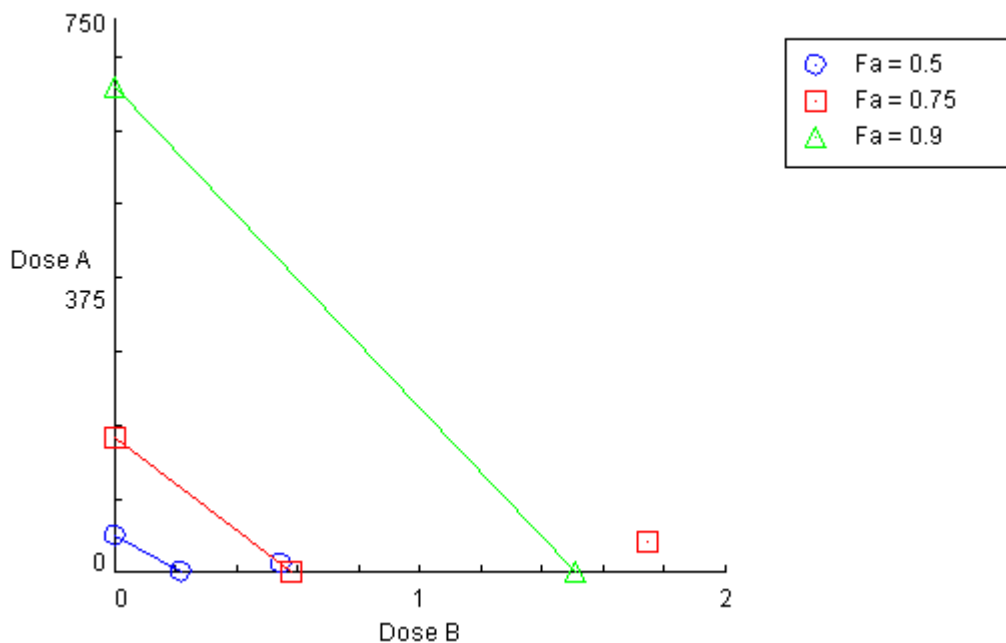

## Summary Table

|                         |                                                                                                                |
|-------------------------|----------------------------------------------------------------------------------------------------------------|
| <b>Experiment Name:</b> | S. triloba-PTX combo                                                                                           |
| <b>Date:</b>            | 17-Aug-2022                                                                                                    |
| <b>File Name:</b>       | E:\AUC-BIOT\Miscellaneous\Naela Saleh\Naela- Sage Project\Files from Naela\Combination troubleshoot_Eric-F.cse |
| <b>Description</b>      |                                                                                                                |
| <b>Drug:</b>            | Salvia triloba (ST) [µg/ml]                                                                                    |
| <b>Drug:</b>            | Paclitaxel (PTX) [µg/ml]                                                                                       |
| <b>Drug Combo:</b>      | S.triloba-Paclitaxel (ST-PTX) (ST+PTX [1:0.04142])                                                             |

| Drug/Combo | Dm      | m       | r       |
|------------|---------|---------|---------|
| ST         | 50.9282 | 0.85854 | 0.95870 |
| PTX        | 0.22062 | 1.14170 | 0.89187 |
| ST-PTX     | 13.8357 | 0.95052 | 0.91799 |

CI values at:

| Combo  | ED50    | ED75    | ED90    | ED95    |
|--------|---------|---------|---------|---------|
| ST-PTX | 2.75515 | 3.25740 | 3.87692 | 4.37727 |

Data for Fa = 0.5

| Drug/Combo | CI value | Dose ST | Dose PTX |
|------------|----------|---------|----------|
| ST         |          | 50.9282 |          |
| PTX        |          |         | 0.22062  |
| ST-PTX     | 2.75515  | 13.2855 | 0.55028  |

Data for Fa = 0.75

| Drug/Combo | CI value | Dose ST | Dose PTX |
|------------|----------|---------|----------|
| ST         |          | 183.104 |          |
| PTX        |          |         | 0.57749  |
| ST-PTX     | 3.25740  | 42.2020 | 1.74801  |

---

Data for Fa = 0.9

| Drug/Combo | CI value | Dose ST | Dose PTX |
|------------|----------|---------|----------|
| ST         |          | 658.318 |          |
| PTX        |          |         | 1.51163  |
| ST-PTX     | 3.87692  | 134.057 | 5.55263  |

---

Data for Fa = 0.95

| Drug/Combo | CI value | Dose ST | Dose PTX |
|------------|----------|---------|----------|
| ST         |          | 1571.87 |          |
| PTX        |          |         | 2.90856  |
| ST-PTX     | 4.37727  | 294.233 | 12.1871  |

---

Data for Fa = 0.97

| Drug/Combo | CI value | Dose ST | Dose PTX |
|------------|----------|---------|----------|
| ST         |          | 2919.85 |          |
| PTX        |          |         | 4.63358  |
| ST-PTX     | 4.77780  | 514.762 | 21.3215  |
