# Supplementary material for: Evaluating the Potential Anticancer Properties of Salvia triloba in Human-Osteosarcoma U2OS Cell Line and Ovarian Adenocarcinoma SKOV3 Cell Line
Source: MDPI journal article supplement (doi:10.3390/app122211545), 2022-11-15
Supplement: s1 [file s1]

**Table S1. Summary of *S. triloba* acetone extract IC<sub>50</sub> values in U2OS and SKOV3 cells**

| Cell line | Treatment  | Time (h) | IC <sub>50</sub><br>(µg/mL)<br>± std error | Hill Slope<br>± std error | Sy.x* | R Square |
|-----------|------------|----------|--------------------------------------------|---------------------------|-------|----------|
| U2OS      | Acetone    | 48       | 30.210 ±<br>1.180                          | 0.8665 ±<br>0.137         | 15.63 | 0.7969   |
| U2OS      | Cisplatin  | 48       | 3.033 ±<br>1.189                           | 2.761 ±<br>0.7938         | 9.904 | 0.9186   |
| SKOV3     | Acetone    | 48       | 75.960 ±<br>1.024                          | 6.678 ±<br>3.928          | 12.86 | 0.8902   |
| SKOV3     | Paclitaxel | 48       | 3.148 ±<br>1.197                           | 1.043 ±<br>0.202          | 15.53 | 0.771    |
