# Supplementary material for: Evaluating the Potential Anticancer Properties of Salvia triloba in Human-Osteosarcoma U2OS Cell Line and Ovarian Adenocarcinoma SKOV3 Cell Line
Source: MDPI journal article supplement (doi:10.3390/app122211545), 2022-11-15
Supplement: s1 [file s1]

**Table S4. qPCR primer sequences**

| <b>Gene</b>      | <b>Primer Sequence (5'-3')</b> |
|------------------|--------------------------------|
| $\beta$ -catenin | F: GAGGAGCAGCTTCAGTCCCC        |
|                  | R: GCCATTGTCCACGCTGGATT        |
| RUNX2            | F: GATGGGACTGTGGTTACTGTCA      |
|                  | R: CTCAGATCGTTGAACCTTGC        |
| MDM2             | F: CCCAAGACAAAGAAGAGAGTGTGG    |
|                  | R: CTGGGCAGGGCTTATTCCTTTTCT    |
| N-cadherin       | F: GCGTCTGTAGAGGCTTCTGGT       |
|                  | R: TCTGCAGGCTCACTGCTCTC        |
| Vimentin         | F: CTCAATCGGCGGGACAGCAG        |
|                  | R: GACACGGACCTGGTGGACAT        |
| SETD7            | F: CGAATTACACACCAAGAGGTT       |
|                  | R: TAGGCAACGGTGAGCTCTTC        |
| p53              | F: TCAACAAGATGTTTTGCCAACTG     |
|                  | R: ATGTGCTGTGACTGCTTGTAGATG    |
| BAX              | F: GATGGACGGGTCCGGGGAG         |
|                  | R: GATGCGCTTGAGACACTCGC        |
| PTEN             | F: TGACCAATGGCTAAGTGAAG        |
|                  | R: CGCCTCTGACTGGGAATA          |
| PI3KR1           | F: CGCCTCTTCTTATCAAGCTCGTG     |
|                  | R: GAAGCTGTCGTAATTCTGCCAGG     |
| GAPDH            | F: AAGGTCATCCCTGAGCTGAAC       |
|                  | R: ACGCCTGCTTCACCACCTTCT       |

F: Forward primer

R: Reverse primer
